# Supplementary material
Source: PubMed Central journal article supplement (PMC5119005)
Supplement: AAC.00904-16_zac012165741so1.pdf [file AAC.00904-16_zac012165741so1.pdf]

## Supplementary Material

**Esculentin-1a-derived peptides promote clearance of *P. aeruginosa* internalized in cystic fibrosis bronchial cells as well as lung cells migration: Biochemical properties and a plausible mode of action**

Floriana Cappiello<sup>¥</sup>, Antonio Di Grazia<sup>¥</sup>, Segev-Zarko Li-av<sup>¶</sup>, Silvia Scali<sup>¶</sup>, Loretta Ferrera\*, Luis Galietta\*, Alessandro Pini<sup>¶</sup>, Yechiel Shai<sup>¶</sup>, Y. Peter Di<sup>Φ</sup>, Maria Luisa Mangoni<sup>¥#</sup>

<sup>¥</sup> Department of Biochemical Sciences, Sapienza University of Rome, Rome, 00185, Italy; <sup>¶</sup> Department of Biological Chemistry, The Weizmann Institute of Science, 76100 Rehovot, Israel; <sup>¶</sup> Department of Medical Biotechnology, University of Siena, Siena, 53100 Italy; \* U.O.C. Genetica Medica, Giannina Gaslini Institute, Genoa, Genoa, 16148, Italy; <sup>Φ</sup> Department of Environmental and Occupational Health, University of Pittsburgh, PA 15260, USA

# Corresponding author: Maria Luisa Mangoni, Department of Biochemical Sciences, Sapienza University of Rome. Via degli Apuli, 9-00185, Rome-ITALY  
Phone: +39 06 49917693. Email: [marialuisa.mangoni@uniroma1.it](mailto:marialuisa.mangoni@uniroma1.it)

## Legends to Supplementary figures

**Fig. S1. Peptides' effect on the viability of bronchial epithelial cells in Hank's buffer.** About  $4 \times 10^4$  wt-CFBE (A) or  $\Delta F508$ -CFBE (B) cells suspended in culture medium were plated in wells of a microtiter plate. After overnight incubation at 37 °C in a 5% CO<sub>2</sub> atmosphere, the medium was removed and replaced with 100  $\mu$ l Hank's supplemented with the peptides at different concentrations. After 2h, cell viability was determined by the MTT reduction to insoluble formazan. Cell viability is expressed as percentage with respect to the control (cells not treated with the peptide). All data are the mean of a representative single experiment, performed in triplicate.

**Fig. S2. Proteolytic activity of elastase from human neutrophils on both Esc(1-21) and Esc(1-21)-1c.** Mass spectrometry profile of the two peptides immediately after enzyme addition (A, B) and after 5h (C, D) or 24h (E, F) incubation with the enzyme are reported. Molecular masses for intact peptides and proteolytic fragments produced by elastase treatment are indicated. Insets within each panel show HPLC profile of a peptide. The retention time of the intact peptide is also indicated (18 min). The tables show the mass spectra peaks and the corresponding cleavage fragments. Proteolytic sites of the enzyme on the two peptides are indicated by the arrows. D-amino acids are in italics and underlined.

**Fig. S3. Proteolytic activity of elastase from *P. aeruginosa* on both Esc(1-21) and Esc(1-21)-1c.** As indicated in the legend to Fig. S2, HPLC and mass spectra of each peptide immediately after enzyme addition (A, B) and after 5h (C, D) or 24h (E, F) incubation with the enzyme are reported. Molecular masses for intact peptides and proteolytic fragments produced by elastase treatment are indicated. The tables show the mass spectra peaks and the corresponding cleavage fragments. Proteolytic sites of the enzyme on the two peptides are indicated by the arrows. D-amino acids are in italics and underlined.

**Fig. S4. Proteolytic activity of elastase from human neutrophils on LL-37.** HPLC (A-C) and mass spectrometry profiles (D-F) of the peptide immediately after enzyme addition (A, D) and after 5h (B, E) or 24h (C, F) incubation with the enzyme are reported. Molecular masses for intact peptides and proteolytic fragments produced by elastase treatment are indicated. Retention time of intact peptide is also indicated (23,9 min). Proteolytic sites of the enzyme on LL-37 are indicated by the arrows.

**Fig. S5. Proteolytic activity of elastase from *P. aeruginosa* on LL-37.** HPLC (A-C) and mass spectrometry profiles (D-F) of the peptide immediately after enzyme addition (A, D) and after 5h (B, E) or 24h (C, F) incubation with the enzyme are reported. Molecular masses for intact peptides and proteolytic fragments produced by elastase treatment are indicated. Retention time of intact peptide is also indicated (23,9 min). Proteolytic sites of the enzyme on LL-37 are indicated by the arrows.

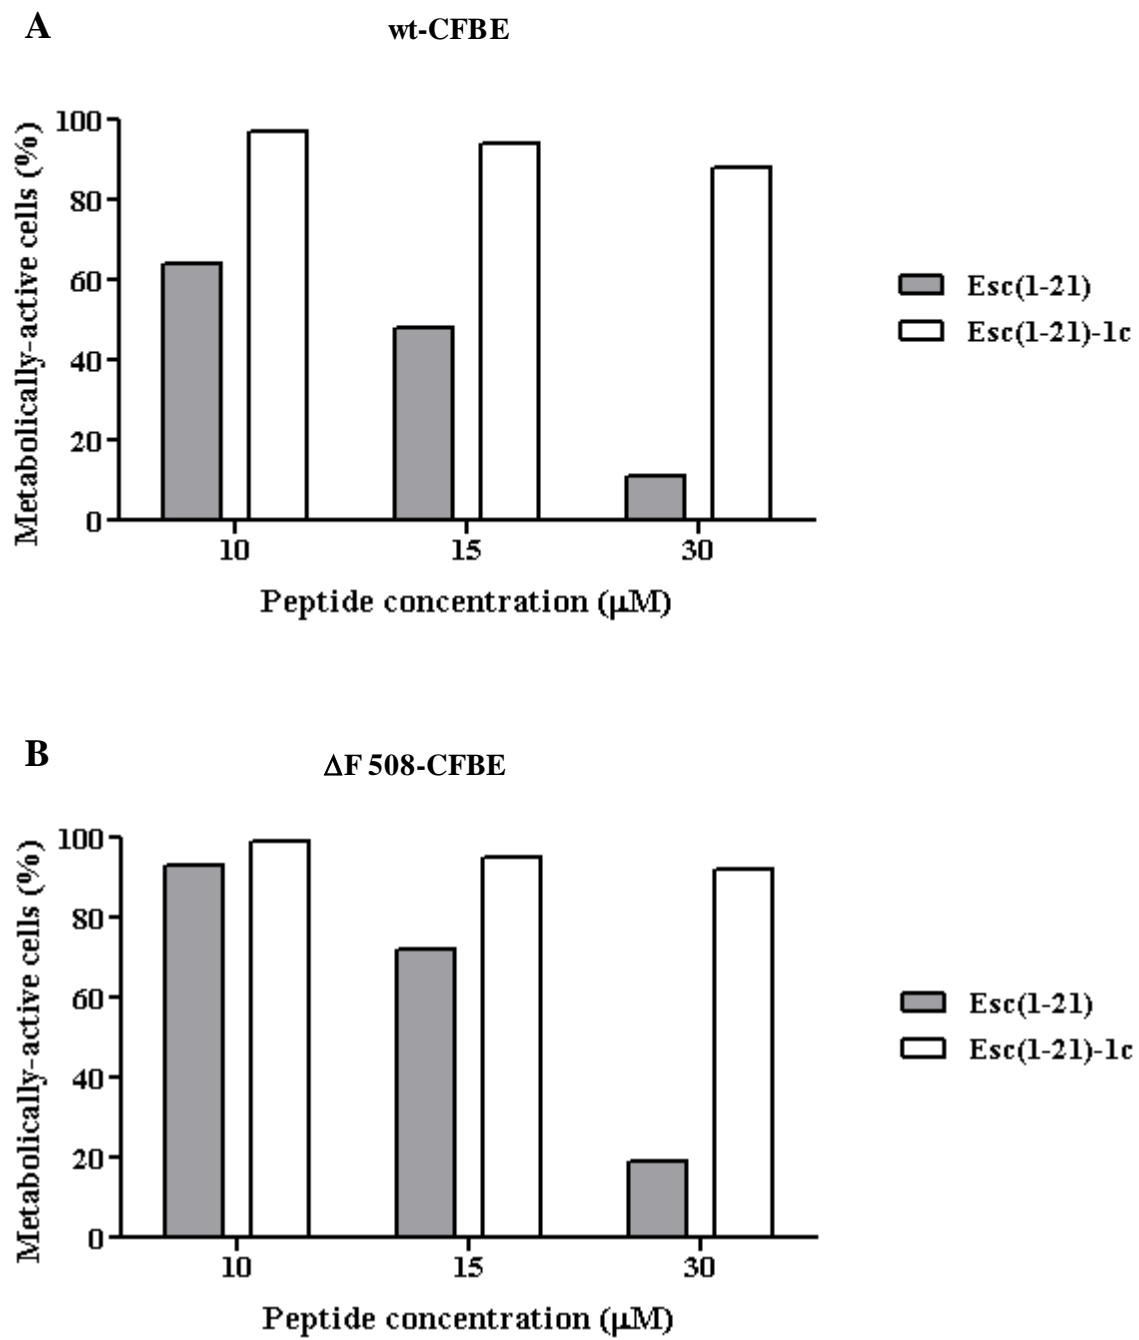

Fig.S1

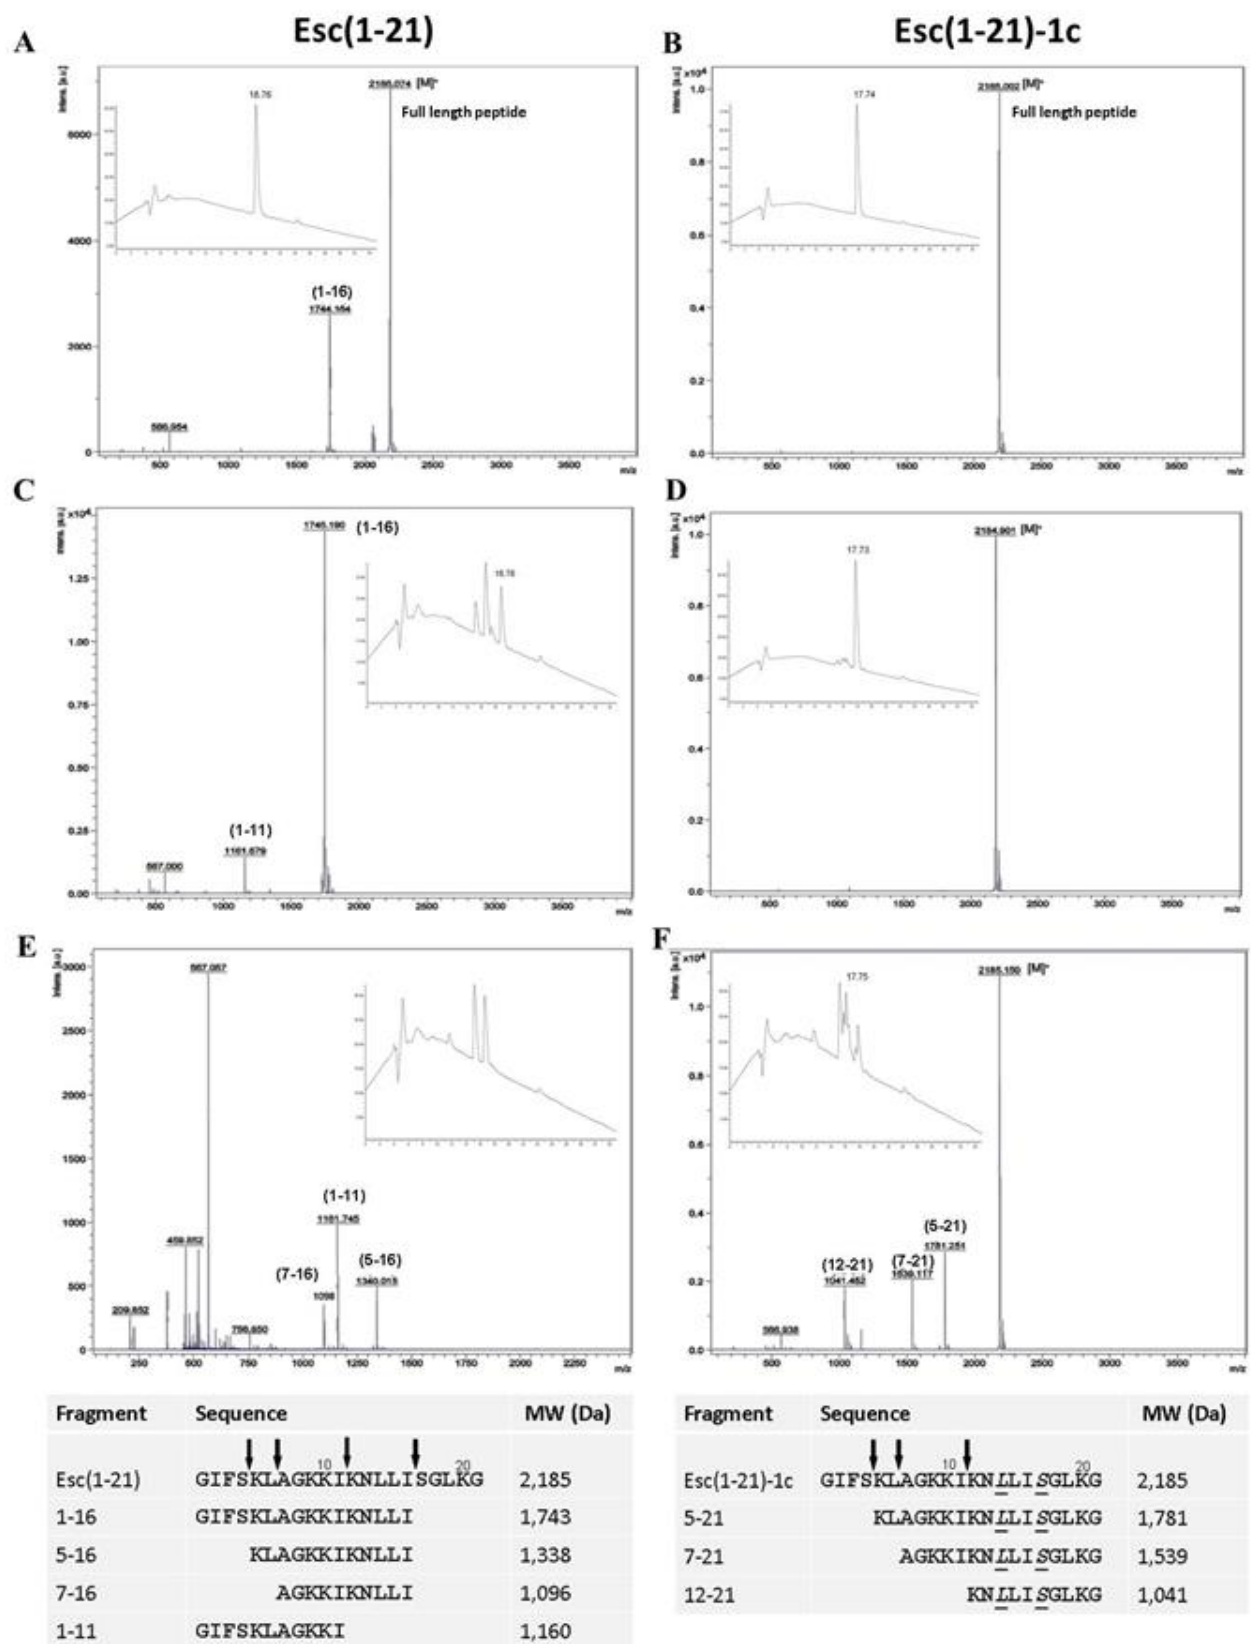

Fig. S2

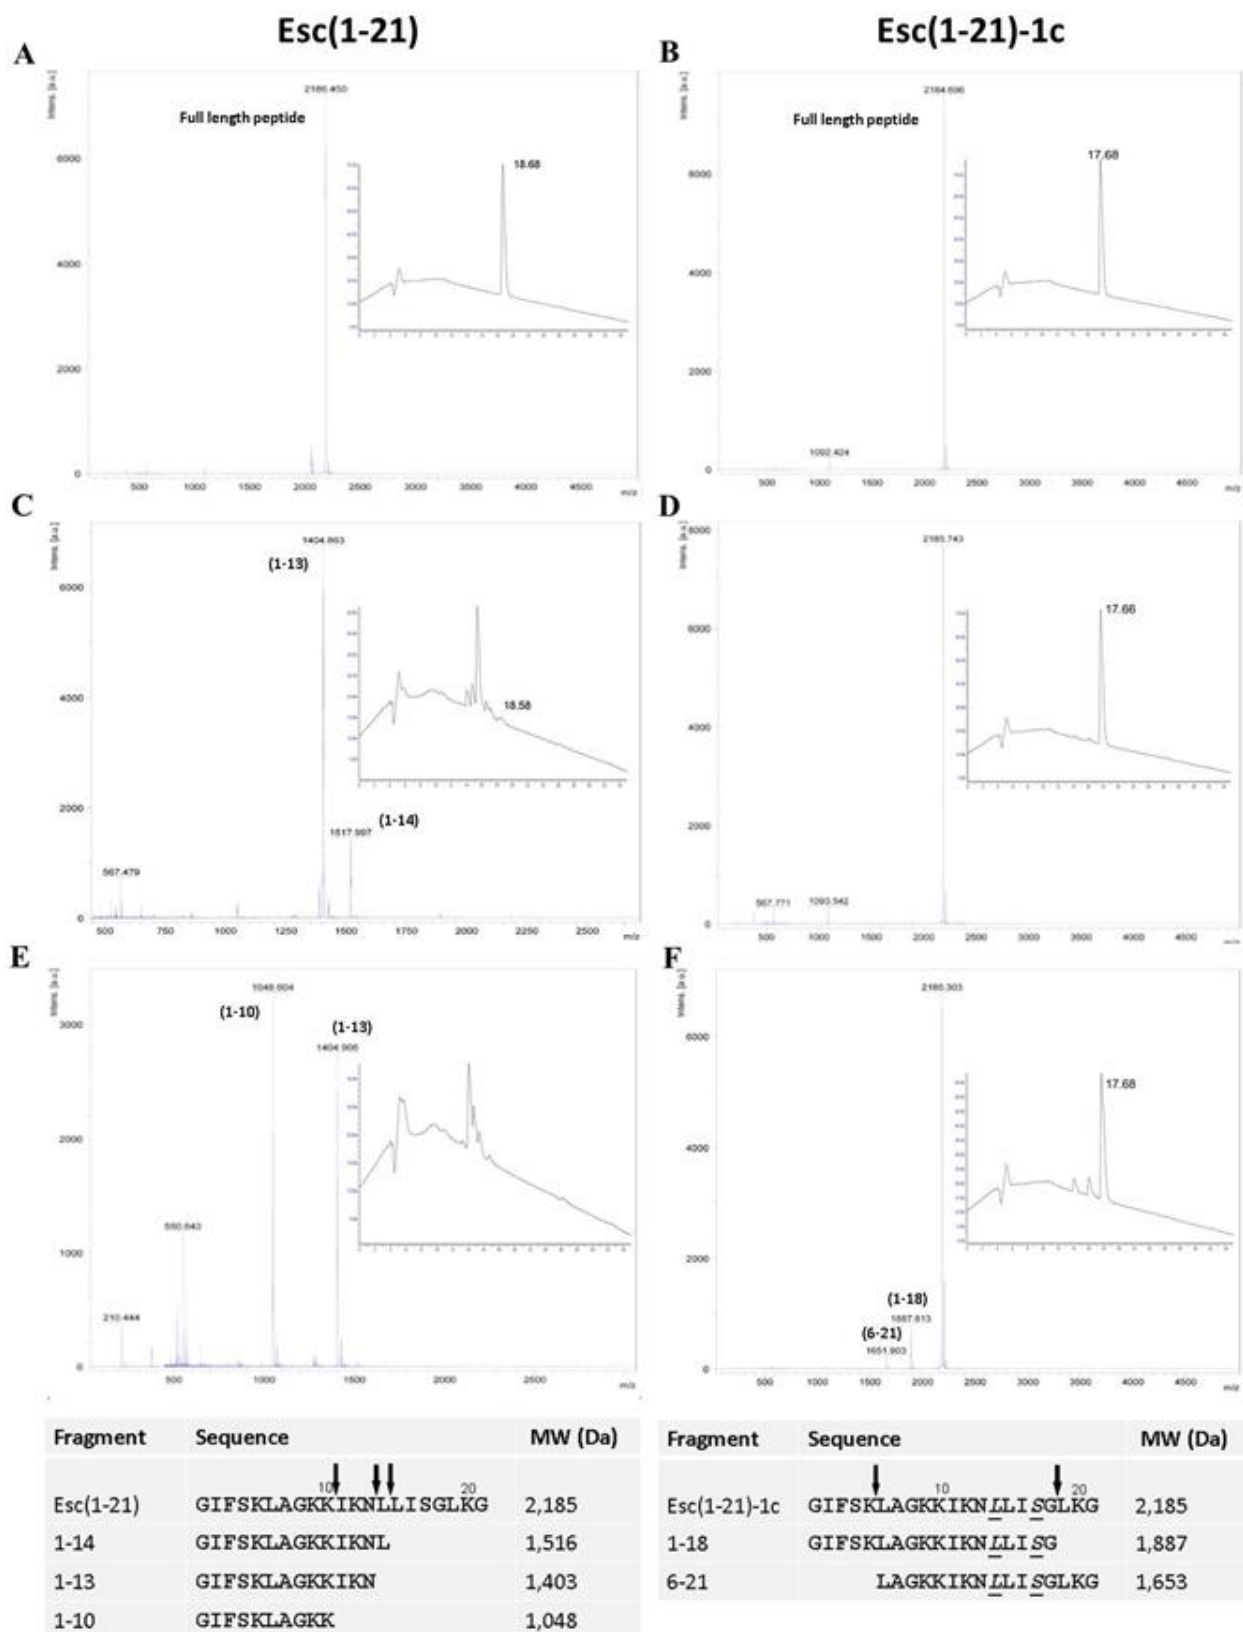

Fig. S3

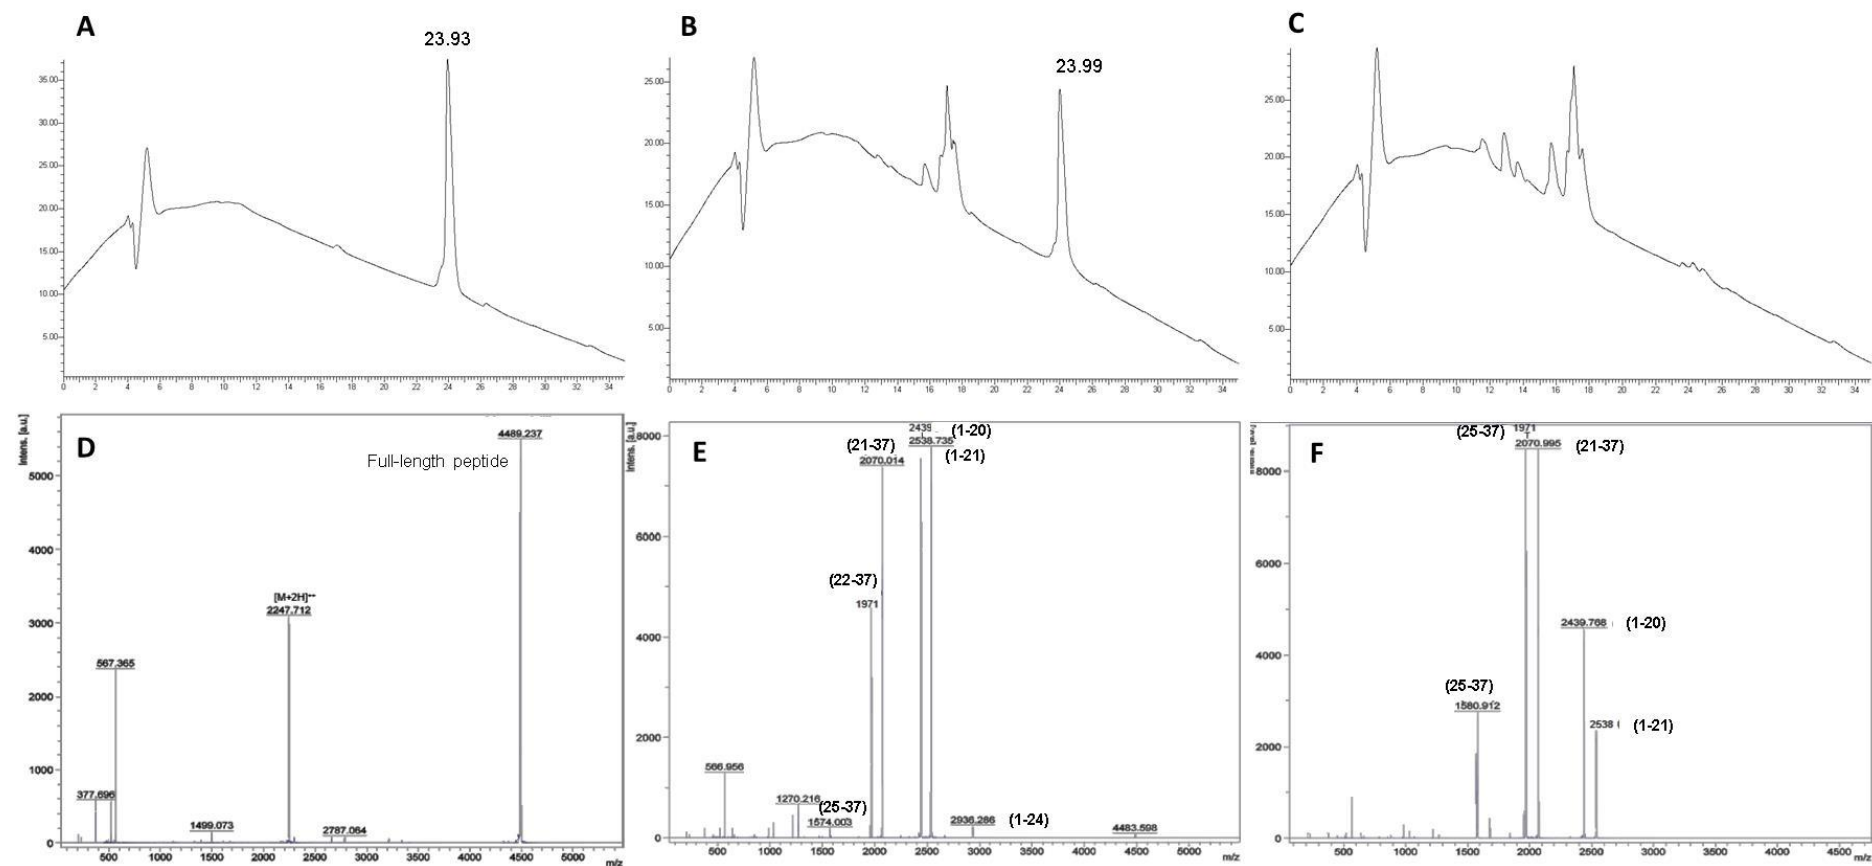

|               |                                                                 |          |                |                                               |          |
|---------------|-----------------------------------------------------------------|----------|----------------|-----------------------------------------------|----------|
| LL37          | <sup>1</sup> LLGDFFRKSKEIGKEFKRIVQRIKDFLRNLVPRTES <sup>37</sup> | 4,493 Da |                |                                               |          |
| Fragment 1-24 | <sup>1</sup> LLGDFFRKSKEIGKEFKRIVQRI <sup>24</sup>              | 2,936 Da | Fragment 21-37 | <sup>21</sup> VQRIKDFLRNLVPRTES <sup>37</sup> | 2,070 Da |
| Fragment 1-21 | <sup>1</sup> LLGDFFRKSKEIGKEFKRIV <sup>21</sup>                 | 2,538 Da | Fragment 22-37 | <sup>22</sup> QRIKDFLRNLVPRTES <sup>37</sup>  | 1,971 Da |
| Fragment 1-20 | <sup>1</sup> LLGDFFRKSKEIGKEFKRI <sup>20</sup>                  | 2,439 Da | Fragment 25-37 | <sup>25</sup> KDFLRNLVPRTES <sup>37</sup>     | 1,574 Da |

Fig. S4

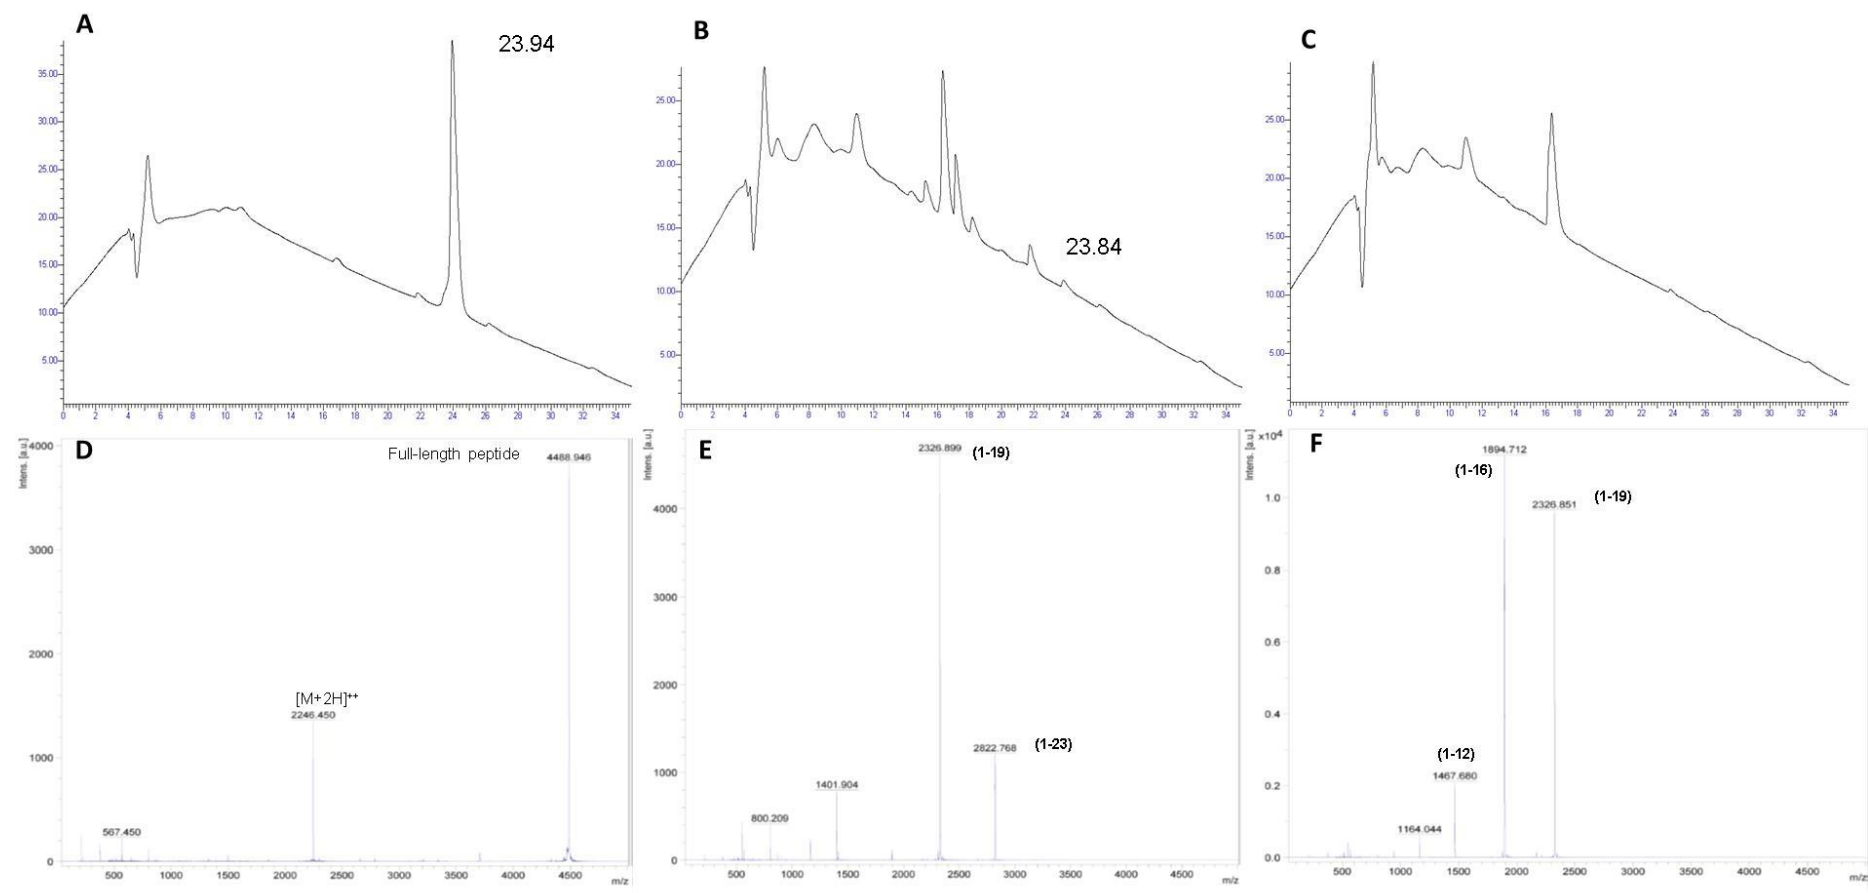

|               |                                           |          |
|---------------|-------------------------------------------|----------|
| LL37          | 1 LLGDFFRKSKEKIGKEFKRIVQRIKDFLRNLPRTES 37 | 4,493 Da |
| Fragment 1-23 | 1 LLGDFFRKSKEKIGKEFKRIVQR 23              | 2,823 Da |
| Fragment 1-19 | 1 LLGDFFRKSKEKIGKEFKR 19                  | 2,326 Da |
| Fragment 1-16 | 1 LLGDFFRKSKEKIGKE 16                     | 1,895 Da |
| Fragment 1-12 | 1 LLGDFFRKSKEK 12                         | 1,467 Da |

Fig. S5
